# Supplementary material
Source: PubMed Central journal article supplement (PMC5817473)
Supplement: jama-318-45-s001.pdf [file jama-318-45-s001.pdf]

## Supplementary Online Content

Wysham C, Bhargava A, Chaykin L, et al. Effect of insulin degludec vs insulin glargine U100 on hypoglycemia in patients with type 2 diabetes: the SWITCH 2 randomized clinical trial. *JAMA*. doi:10.1001/jama.2017.7117

**eFigure 1.** Trial design

**eFigure 2.** Hypoglycemia definition

**eFigure 3.** Hierarchical testing procedure

**eFigure 4.** Sensitivity analyses – maintenance period

**eFigure 5.** Fasting plasma glucose (A) and pre-breakfast self-measured blood glucose (B) over time

**eTable 1.** Titration algorithm

**eTable 2.** Medical Dictionary for Regulatory Activities (MedDRA) predefined search of safety data

**eTable 3.** Multiple imputation tipping analysis for primary endpoint

**eTable 4.** Insulin dose

**eTable 5.** Adverse events

This supplementary material has been provided by the authors to give readers additional information about their work.

## eFigure 1. Trial design

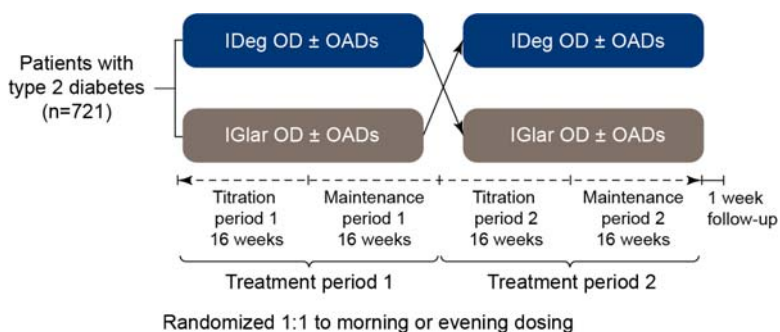

IDeg, insulin degludec; IGlar, insulin glargine U100; OAD, oral antidiabetic drug; OD, once daily.

## eFigure 2. Hypoglycemia definition

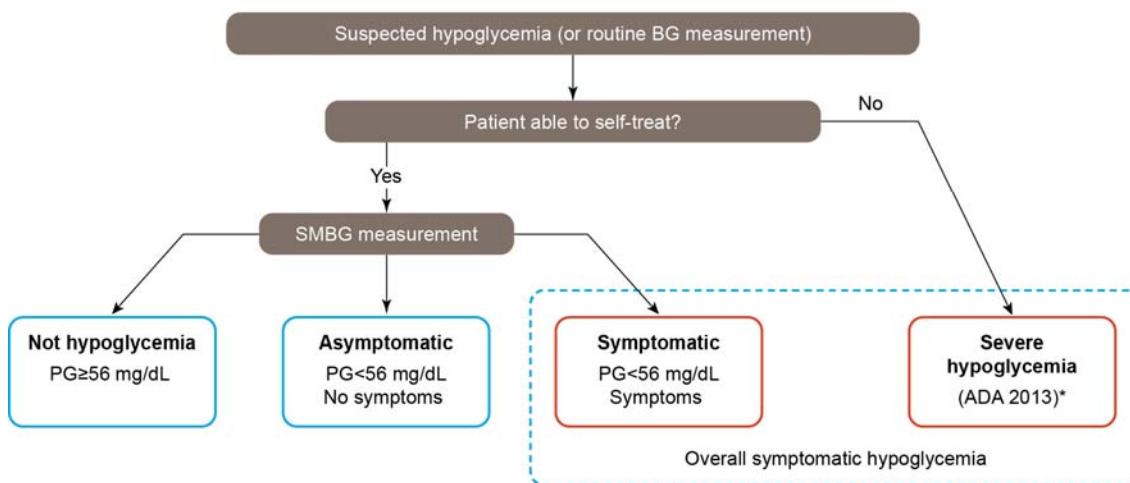

\*An episode requiring assistance of another person to actively administer carbohydrate, glucagon, or take other corrective actions and/or neurological recovery following the return of plasma glucose to normal (ADA 2013; Seaquist et al. *Diabetes Care*. 2013;36(5):1384–95). Nocturnal episodes were defined as episodes occurring between 00:01 and 05:59 (both inclusive). Blue dashed box signifies endpoints included as confirmatory endpoints. To convert glucose to mmol/L, multiply by 0.0555. ADA, American Diabetes Association; BG, blood glucose; PG, plasma glucose; SMBG, self-measured blood glucose.

**eFigure 3. Hierarchical testing procedure**

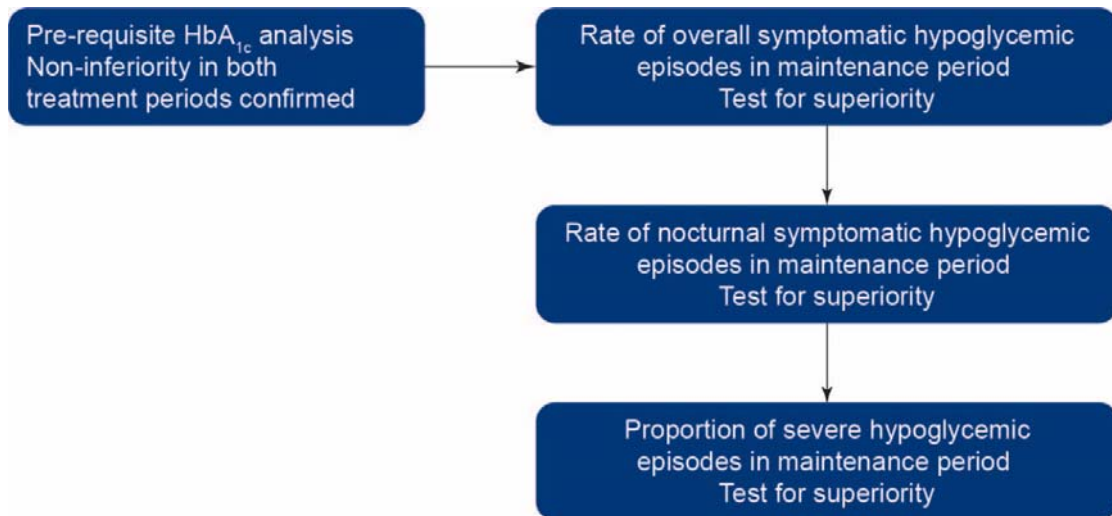

**eFigure 4. Sensitivity analyses – maintenance period**

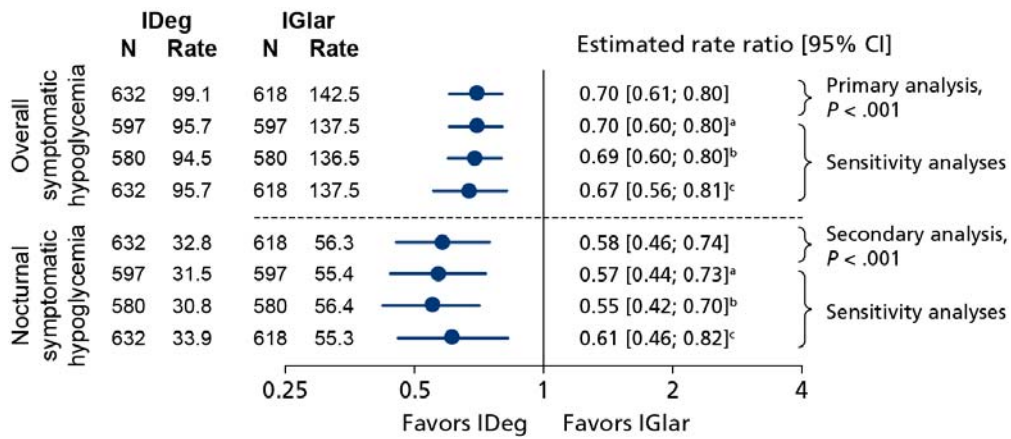

All episodes of severe hypoglycemia were confirmed by external adjudication committee. Rates are least squares mean in events per 100 PYE; N, number of patients contributing to the analysis. <sup>a</sup>Poisson model on subset of patients with exposure in both maintenance periods; <sup>b</sup>Poisson model on the completer analysis set; <sup>c</sup>Negative binomial model. CI, confidence interval; IDeg, insulin degludec; IGlar, insulin glargine U100; PYE, patient-years of exposure.

**eFigure 5. Fasting plasma glucose (A) and pre-breakfast self-measured blood glucose (B) over time**

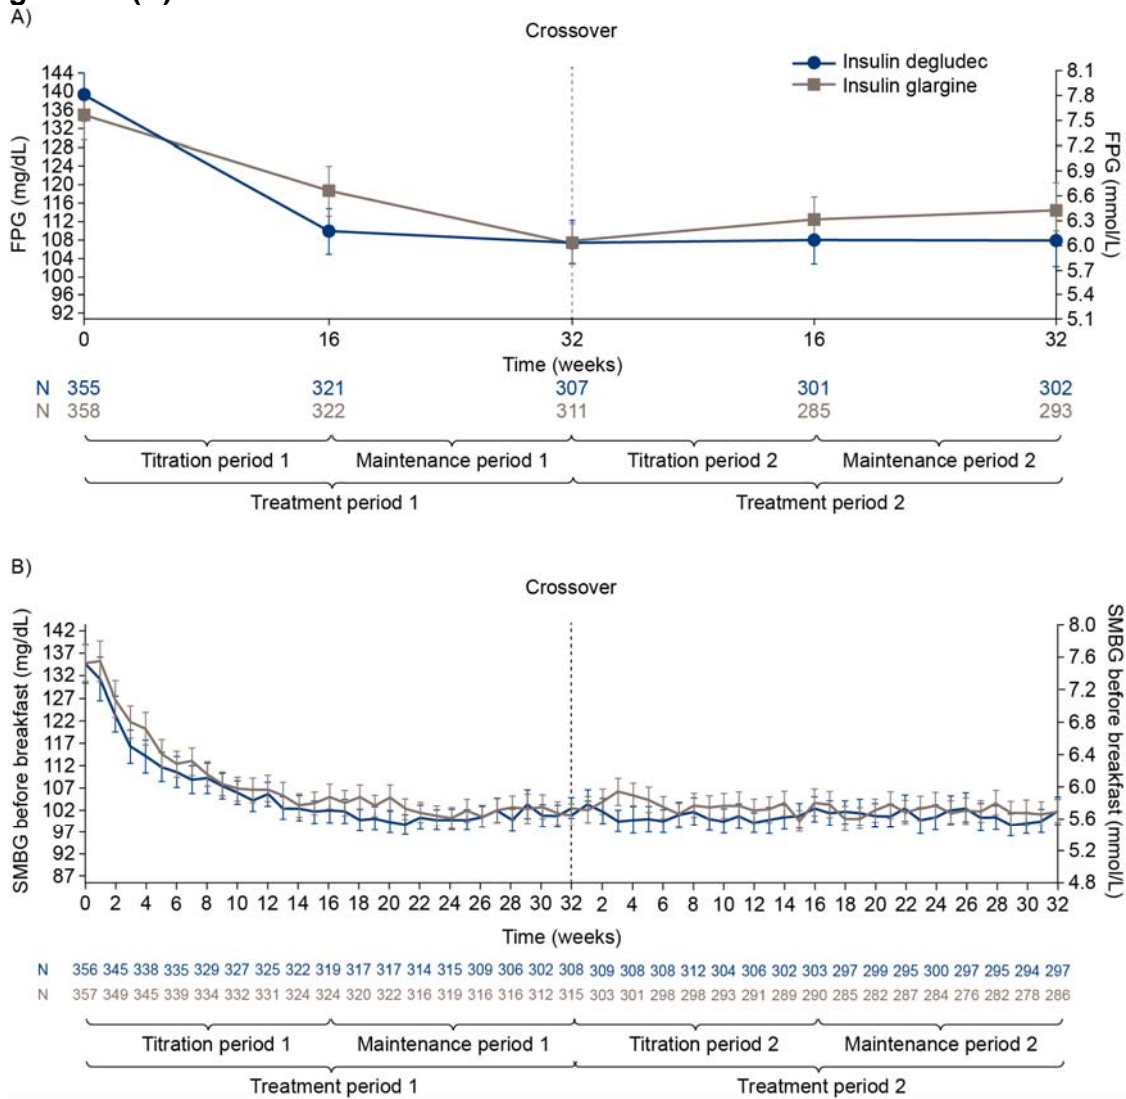

Data are observed mean  $\pm$  95% CI for full analysis set. To convert glucose to mmol/L, multiply by 0.0555.  
N, number of patients contributing to the data at that time point. CI, confidence intervals; FPG, fasting plasma glucose; SMBG, self-measured blood glucose.

**eTable 1. Titration algorithm**

| Pre-breakfast blood glucose measurement <sup>a</sup> |         | Adjustment |
|------------------------------------------------------|---------|------------|
| mg/dL                                                | mmol/L  | Units      |
| <56                                                  | <3.1    | -4         |
| 56-70                                                | 3.1-3.9 | -2         |
| 71-90                                                | 4.0-5.0 | 0          |
| 91-126                                               | 5.1-7.0 | +2         |
| 127-144                                              | 7.1-8.0 | +4         |
| 145-162                                              | 8.1-9.0 | +6         |
| >162                                                 | >9.0    | +8         |

<sup>a</sup>Once-weekly titration based on the mean of 3 consecutive days' measurements.

**eTable 2. Medical Dictionary for Regulatory Activities (MedDRA) predefined search of safety data**

| Standardized MedDRA queries (SMQ) | Preferred term               | Term scope text |
|-----------------------------------|------------------------------|-----------------|
| Accidents and injuries (SMQ)      | Abdomen crushing             | Narrow          |
| Accidents and injuries (SMQ)      | Abdominal injury             | Narrow          |
| Accidents and injuries (SMQ)      | Accident                     | Narrow          |
| Accidents and injuries (SMQ)      | Accident at home             | Narrow          |
| Accidents and injuries (SMQ)      | Accident at work             | Narrow          |
| Accidents and injuries (SMQ)      | Accidental death             | Narrow          |
| Accidents and injuries (SMQ)      | Acetabulum fracture          | Narrow          |
| Accidents and injuries (SMQ)      | Acoustic shock               | Narrow          |
| Accidents and injuries (SMQ)      | Acrotrophodynia              | Broad           |
| Accidents and injuries (SMQ)      | Adrenal gland injury         | Narrow          |
| Accidents and injuries (SMQ)      | Anal injury                  | Narrow          |
| Accidents and injuries (SMQ)      | Animal bite                  | Broad           |
| Accidents and injuries (SMQ)      | Ankle fracture               | Narrow          |
| Accidents and injuries (SMQ)      | Aortic injury                | Narrow          |
| Accidents and injuries (SMQ)      | Aortic rupture               | Narrow          |
| Accidents and injuries (SMQ)      | Aponeurosis contusion        | Narrow          |
| Accidents and injuries (SMQ)      | Arterial injury              | Narrow          |
| Accidents and injuries (SMQ)      | Arterial rupture             | Narrow          |
| Accidents and injuries (SMQ)      | Atrial rupture               | Narrow          |
| Accidents and injuries (SMQ)      | Atypical femur fracture      | Narrow          |
| Accidents and injuries (SMQ)      | Atypical fracture            | Narrow          |
| Accidents and injuries (SMQ)      | Avulsion fracture            | Narrow          |
| Accidents and injuries (SMQ)      | Axillary nerve injury        | Narrow          |
| Accidents and injuries (SMQ)      | Back injury                  | Narrow          |
| Accidents and injuries (SMQ)      | Bile duct stenosis traumatic | Narrow          |
| Accidents and injuries (SMQ)      | Bladder injury               | Narrow          |
| Accidents and injuries (SMQ)      | Bladder perforation          | Narrow          |
| Accidents and injuries (SMQ)      | Blast injury                 | Narrow          |
| Accidents and injuries (SMQ)      | Blindness traumatic          | Narrow          |
| Accidents and injuries (SMQ)      | Bone contusion               | Narrow          |
| Accidents and injuries (SMQ)      | Bone fissure                 | Narrow          |
| Accidents and injuries (SMQ)      | Bone fragmentation           | Narrow          |
| Accidents and injuries (SMQ)      | Bowman's membrane injury     | Narrow          |
| Accidents and injuries (SMQ)      | Brachial plexus injury       | Narrow          |
| Accidents and injuries (SMQ)      | Brain contusion              | Narrow          |
| Accidents and injuries (SMQ)      | Breast injury                | Narrow          |
| Accidents and injuries (SMQ)      | Burn oral cavity             | Narrow          |
| Accidents and injuries (SMQ)      | Burns first degree           | Narrow          |
| Accidents and injuries (SMQ)      | Burns fourth degree          | Narrow          |
| Accidents and injuries (SMQ)      | Burns second degree          | Narrow          |
| Accidents and injuries (SMQ)      | Burns third degree           | Narrow          |
| Accidents and injuries (SMQ)      | Bursa injury                 | Narrow          |
| Accidents and injuries (SMQ)      | Buttock crushing             | Narrow          |
| Accidents and injuries (SMQ)      | Cardiac contusion            | Narrow          |
| Accidents and injuries (SMQ)      | Cartilage injury             | Narrow          |
| Accidents and injuries (SMQ)      | Cataract traumatic           | Narrow          |
| Accidents and injuries (SMQ)      | Cervical vertebral fracture  | Narrow          |
| Accidents and injuries (SMQ)      | Chance fracture              | Narrow          |
| Accidents and injuries (SMQ)      | Chemical burn of skin        | Narrow          |
| Accidents and injuries (SMQ)      | Chemical burns of eye        | Narrow          |

| Standardized MedDRA queries (SMQ) | Preferred term                 | Term scope text |
|-----------------------------------|--------------------------------|-----------------|
| Accidents and injuries (SMQ)      | Chemical eye injury            | Narrow          |
| Accidents and injuries (SMQ)      | Chemical injury                | Narrow          |
| Accidents and injuries (SMQ)      | Chemical iritis                | Narrow          |
| Accidents and injuries (SMQ)      | Chest crushing                 | Narrow          |
| Accidents and injuries (SMQ)      | Chest injury                   | Narrow          |
| Accidents and injuries (SMQ)      | Chillblains                    | Broad           |
| Accidents and injuries (SMQ)      | Clavicle fracture              | Narrow          |
| Accidents and injuries (SMQ)      | Closed globe injury            | Narrow          |
| Accidents and injuries (SMQ)      | Cold exposure injury           | Broad           |
| Accidents and injuries (SMQ)      | Colon injury                   | Narrow          |
| Accidents and injuries (SMQ)      | Comminuted fracture            | Narrow          |
| Accidents and injuries (SMQ)      | Commotio retinae               | Narrow          |
| Accidents and injuries (SMQ)      | Complicated fracture           | Narrow          |
| Accidents and injuries (SMQ)      | Compression fracture           | Narrow          |
| Accidents and injuries (SMQ)      | Concussion                     | Narrow          |
| Accidents and injuries (SMQ)      | Conjunctival abrasion          | Narrow          |
| Accidents and injuries (SMQ)      | Conjunctival laceration        | Narrow          |
| Accidents and injuries (SMQ)      | Contusion                      | Narrow          |
| Accidents and injuries (SMQ)      | Corneal abrasion               | Narrow          |
| Accidents and injuries (SMQ)      | Corneal perforation            | Broad           |
| Accidents and injuries (SMQ)      | Corrosive oropharyngeal injury | Narrow          |
| Accidents and injuries (SMQ)      | Cranial nerve injury           | Narrow          |
| Accidents and injuries (SMQ)      | Craniocerebral injury          | Narrow          |
| Accidents and injuries (SMQ)      | Crush injury                   | Narrow          |
| Accidents and injuries (SMQ)      | Crush syndrome                 | Narrow          |
| Accidents and injuries (SMQ)      | Crushing injury of trunk       | Narrow          |
| Accidents and injuries (SMQ)      | Deafness traumatic             | Narrow          |
| Accidents and injuries (SMQ)      | Decapitation                   | Narrow          |
| Accidents and injuries (SMQ)      | Deep dissecting hematoma       | Broad           |
| Accidents and injuries (SMQ)      | Diaphragmatic injury           | Narrow          |
| Accidents and injuries (SMQ)      | Diaphragmatic rupture          | Narrow          |
| Accidents and injuries (SMQ)      | Diffuse axonal injury          | Narrow          |
| Accidents and injuries (SMQ)      | Dislocation of sternum         | Narrow          |
| Accidents and injuries (SMQ)      | Dislocation of vertebra        | Narrow          |
| Accidents and injuries (SMQ)      | Drowning                       | Narrow          |
| Accidents and injuries (SMQ)      | Dural tear                     | Narrow          |
| Accidents and injuries (SMQ)      | Ear abrasion                   | Narrow          |
| Accidents and injuries (SMQ)      | Ear canal abrasion             | Narrow          |
| Accidents and injuries (SMQ)      | Ear canal injury               | Narrow          |
| Accidents and injuries (SMQ)      | Ear canal stenosis traumatic   | Narrow          |
| Accidents and injuries (SMQ)      | Ear injury                     | Narrow          |
| Accidents and injuries (SMQ)      | Electric injury                | Narrow          |
| Accidents and injuries (SMQ)      | Electric shock                 | Narrow          |
| Accidents and injuries (SMQ)      | Electrocution                  | Narrow          |
| Accidents and injuries (SMQ)      | Enophthalmos traumatic         | Narrow          |
| Accidents and injuries (SMQ)      | Epidural hemorrhage            | Broad           |
| Accidents and injuries (SMQ)      | Epiphyseal fracture            | Narrow          |
| Accidents and injuries (SMQ)      | Epiphyseal injury              | Narrow          |
| Accidents and injuries (SMQ)      | Epiphysiolysis                 | Broad           |
| Accidents and injuries (SMQ)      | Excoriation                    | Broad           |
| Accidents and injuries (SMQ)      | External genitalia crushing    | Narrow          |
| Accidents and injuries (SMQ)      | Extradural hematoma            | Broad           |
| Accidents and injuries (SMQ)      | Eye burns                      | Narrow          |

| <b>Standardized MedDRA queries (SMQ)</b> | <b>Preferred term</b>                    | <b>Term scope text</b> |
|------------------------------------------|------------------------------------------|------------------------|
| Accidents and injuries (SMQ)             | Eye contusion                            | Narrow                 |
| Accidents and injuries (SMQ)             | Eye injury                               | Narrow                 |
| Accidents and injuries (SMQ)             | Eye luxation                             | Broad                  |
| Accidents and injuries (SMQ)             | Eyeball avulsion                         | Narrow                 |
| Accidents and injuries (SMQ)             | Eyelash injury                           | Narrow                 |
| Accidents and injuries (SMQ)             | Eyelid contusion                         | Narrow                 |
| Accidents and injuries (SMQ)             | Eyelid hematoma                          | Narrow                 |
| Accidents and injuries (SMQ)             | Eyelid injury                            | Narrow                 |
| Accidents and injuries (SMQ)             | Face crushing                            | Narrow                 |
| Accidents and injuries (SMQ)             | Face injury                              | Narrow                 |
| Accidents and injuries (SMQ)             | Facial bones fracture                    | Narrow                 |
| Accidents and injuries (SMQ)             | Facial nerve injury due to birth trauma  | Narrow                 |
| Accidents and injuries (SMQ)             | Fall                                     | Narrow                 |
| Accidents and injuries (SMQ)             | Femoral neck fracture                    | Narrow                 |
| Accidents and injuries (SMQ)             | Femoral nerve injury                     | Narrow                 |
| Accidents and injuries (SMQ)             | Femur fracture                           | Narrow                 |
| Accidents and injuries (SMQ)             | Fibula fracture                          | Narrow                 |
| Accidents and injuries (SMQ)             | Flail chest                              | Narrow                 |
| Accidents and injuries (SMQ)             | Foot fracture                            | Narrow                 |
| Accidents and injuries (SMQ)             | Forearm fracture                         | Narrow                 |
| Accidents and injuries (SMQ)             | Foreign body aspiration                  | Broad                  |
| Accidents and injuries (SMQ)             | Foreign body in eye                      | Narrow                 |
| Accidents and injuries (SMQ)             | Fracture                                 | Narrow                 |
| Accidents and injuries (SMQ)             | Fracture displacement                    | Narrow                 |
| Accidents and injuries (SMQ)             | Fracture of clavicle due to birth trauma | Narrow                 |
| Accidents and injuries (SMQ)             | Fracture of penis                        | Narrow                 |
| Accidents and injuries (SMQ)             | Fracture pain                            | Broad                  |
| Accidents and injuries (SMQ)             | Fractured coccyx                         | Narrow                 |
| Accidents and injuries (SMQ)             | Fractured ischium                        | Narrow                 |
| Accidents and injuries (SMQ)             | Fractured sacrum                         | Narrow                 |
| Accidents and injuries (SMQ)             | Fractured skull depressed                | Narrow                 |
| Accidents and injuries (SMQ)             | Frostbite                                | Broad                  |
| Accidents and injuries (SMQ)             | Gallbladder injury                       | Narrow                 |
| Accidents and injuries (SMQ)             | Gallbladder perforation                  | Broad                  |
| Accidents and injuries (SMQ)             | Gastrointestinal injury                  | Narrow                 |
| Accidents and injuries (SMQ)             | Genital contusion                        | Narrow                 |
| Accidents and injuries (SMQ)             | Genital injury                           | Narrow                 |
| Accidents and injuries (SMQ)             | Gingival injury                          | Narrow                 |
| Accidents and injuries (SMQ)             | Glaucoma traumatic                       | Narrow                 |
| Accidents and injuries (SMQ)             | Greenstick fracture                      | Narrow                 |
| Accidents and injuries (SMQ)             | Gun shot wound                           | Narrow                 |
| Accidents and injuries (SMQ)             | Hematuria traumatic                      | Narrow                 |
| Accidents and injuries (SMQ)             | Hemothorax                               | Broad                  |
| Accidents and injuries (SMQ)             | Hand fracture                            | Narrow                 |
| Accidents and injuries (SMQ)             | Head injury                              | Narrow                 |
| Accidents and injuries (SMQ)             | Heart injury                             | Broad                  |
| Accidents and injuries (SMQ)             | Heat cramps                              | Broad                  |
| Accidents and injuries (SMQ)             | Heat exhaustion                          | Broad                  |
| Accidents and injuries (SMQ)             | Heat stroke                              | Broad                  |
| Accidents and injuries (SMQ)             | Hepatic rupture                          | Narrow                 |
| Accidents and injuries (SMQ)             | Hernia perforation                       | Narrow                 |
| Accidents and injuries (SMQ)             | Hip fracture                             | Narrow                 |



| Standardized MedDRA queries (SMQ) | Preferred term                                | Term scope text |
|-----------------------------------|-----------------------------------------------|-----------------|
| Accidents and injuries (SMQ)      | Human bite                                    | Broad           |
| Accidents and injuries (SMQ)      | Humerus fracture                              | Narrow          |
| Accidents and injuries (SMQ)      | Hyperthermia                                  | Broad           |
| Accidents and injuries (SMQ)      | Hyphemia                                      | Narrow          |
| Accidents and injuries (SMQ)      | Hypothermia                                   | Broad           |
| Accidents and injuries (SMQ)      | IIIrd nerve injury                            | Narrow          |
| Accidents and injuries (SMQ)      | IVth nerve injury                             | Narrow          |
| Accidents and injuries (SMQ)      | Ilium fracture                                | Narrow          |
| Accidents and injuries (SMQ)      | Impacted fracture                             | Narrow          |
| Accidents and injuries (SMQ)      | Inguinal hernia perforation                   | Narrow          |
| Accidents and injuries (SMQ)      | Injury                                        | Narrow          |
| Accidents and injuries (SMQ)      | Injury corneal                                | Narrow          |
| Accidents and injuries (SMQ)      | Injury to brachial plexus due to birth trauma | Narrow          |
| Accidents and injuries (SMQ)      | Internal injury                               | Narrow          |
| Accidents and injuries (SMQ)      | Intervertebral disc injury                    | Narrow          |
| Accidents and injuries (SMQ)      | Iris injury                                   | Narrow          |
| Accidents and injuries (SMQ)      | Jaw fracture                                  | Narrow          |
| Accidents and injuries (SMQ)      | Joint dislocation                             | Narrow          |
| Accidents and injuries (SMQ)      | Joint hyperextension                          | Narrow          |
| Accidents and injuries (SMQ)      | Joint injury                                  | Narrow          |
| Accidents and injuries (SMQ)      | Keratorhexis                                  | Broad           |
| Accidents and injuries (SMQ)      | Kidney contusion                              | Narrow          |
| Accidents and injuries (SMQ)      | Kidney rupture                                | Narrow          |
| Accidents and injuries (SMQ)      | Laceration                                    | Narrow          |
| Accidents and injuries (SMQ)      | Laryngeal injury                              | Narrow          |
| Accidents and injuries (SMQ)      | Lens dislocation                              | Broad           |
| Accidents and injuries (SMQ)      | Lenticular injury                             | Narrow          |
| Accidents and injuries (SMQ)      | Ligament injury                               | Narrow          |
| Accidents and injuries (SMQ)      | Ligament rupture                              | Narrow          |
| Accidents and injuries (SMQ)      | Ligament sprain                               | Narrow          |
| Accidents and injuries (SMQ)      | Limb crushing injury                          | Narrow          |
| Accidents and injuries (SMQ)      | Limb fracture                                 | Narrow          |
| Accidents and injuries (SMQ)      | Limb injury                                   | Narrow          |
| Accidents and injuries (SMQ)      | Limb reattachment surgery                     | Narrow          |
| Accidents and injuries (SMQ)      | Limb traumatic amputation                     | Narrow          |
| Accidents and injuries (SMQ)      | Lip injury                                    | Narrow          |
| Accidents and injuries (SMQ)      | Liver contusion                               | Narrow          |
| Accidents and injuries (SMQ)      | Liver injury                                  | Narrow          |
| Accidents and injuries (SMQ)      | Lower limb fracture                           | Narrow          |
| Accidents and injuries (SMQ)      | Lumbar vertebral fracture                     | Narrow          |
| Accidents and injuries (SMQ)      | Lumbosacral plexus injury                     | Narrow          |
| Accidents and injuries (SMQ)      | Lung perforation                              | Broad           |
| Accidents and injuries (SMQ)      | Lymphatic duct injury                         | Narrow          |
| Accidents and injuries (SMQ)      | Median nerve injury                           | Narrow          |
| Accidents and injuries (SMQ)      | Meniscus cyst                                 | Narrow          |
| Accidents and injuries (SMQ)      | Meniscus injury                               | Narrow          |
| Accidents and injuries (SMQ)      | Metallosis of globe                           | Broad           |
| Accidents and injuries (SMQ)      | Mouth injury                                  | Narrow          |
| Accidents and injuries (SMQ)      | Multiple fractures                            | Narrow          |
| Accidents and injuries (SMQ)      | Multiple injuries                             | Narrow          |
| Accidents and injuries (SMQ)      | Muscle contusion                              | Narrow          |
| Accidents and injuries (SMQ)      | Muscle injury                                 | Narrow          |

| <b>Standardized MedDRA queries (SMQ)</b> | <b>Preferred term</b>                               | <b>Term scope text</b> |
|------------------------------------------|-----------------------------------------------------|------------------------|
| Accidents and injuries (SMQ)             | Muscle reattachment                                 | Narrow                 |
| Accidents and injuries (SMQ)             | Muscle rupture                                      | Narrow                 |
| Accidents and injuries (SMQ)             | Muscle strain                                       | Narrow                 |
| Accidents and injuries (SMQ)             | Musculocutaneous nerve injury                       | Narrow                 |
| Accidents and injuries (SMQ)             | Musculoskeletal injury                              | Narrow                 |
| Accidents and injuries (SMQ)             | Myocardial rupture                                  | Narrow                 |
| Accidents and injuries (SMQ)             | Nail avulsion                                       | Narrow                 |
| Accidents and injuries (SMQ)             | Nail injury                                         | Narrow                 |
| Accidents and injuries (SMQ)             | Near drowning                                       | Narrow                 |
| Accidents and injuries (SMQ)             | Neck crushing                                       | Narrow                 |
| Accidents and injuries (SMQ)             | Neck injury                                         | Narrow                 |
| Accidents and injuries (SMQ)             | Nerve compression                                   | Broad                  |
| Accidents and injuries (SMQ)             | Nerve injury                                        | Narrow                 |
| Accidents and injuries (SMQ)             | Nerve root injury                                   | Narrow                 |
| Accidents and injuries (SMQ)             | Nerve root injury cervical                          | Narrow                 |
| Accidents and injuries (SMQ)             | Nerve root injury lumbar                            | Narrow                 |
| Accidents and injuries (SMQ)             | Nerve root injury sacral                            | Narrow                 |
| Accidents and injuries (SMQ)             | Nerve root injury thoracic                          | Narrow                 |
| Accidents and injuries (SMQ)             | Esophageal injury                                   | Narrow                 |
| Accidents and injuries (SMQ)             | Esophageal rupture                                  | Narrow                 |
| Accidents and injuries (SMQ)             | Open fracture                                       | Narrow                 |
| Accidents and injuries (SMQ)             | Open globe injury                                   | Narrow                 |
| Accidents and injuries (SMQ)             | Optic nerve injury                                  | Narrow                 |
| Accidents and injuries (SMQ)             | Optic pathway injury                                | Narrow                 |
| Accidents and injuries (SMQ)             | Osteochondral fracture                              | Narrow                 |
| Accidents and injuries (SMQ)             | Pancreatic duct rupture                             | Narrow                 |
| Accidents and injuries (SMQ)             | Pancreatic injury                                   | Narrow                 |
| Accidents and injuries (SMQ)             | Parasympathetic nerve injury                        | Narrow                 |
| Accidents and injuries (SMQ)             | Patella fracture                                    | Narrow                 |
| Accidents and injuries (SMQ)             | Pellegrini Stieda disease                           | Narrow                 |
| Accidents and injuries (SMQ)             | Pelvic fracture                                     | Narrow                 |
| Accidents and injuries (SMQ)             | Pelvic organ injury                                 | Narrow                 |
| Accidents and injuries (SMQ)             | Penetrating abdominal trauma                        | Narrow                 |
| Accidents and injuries (SMQ)             | Penetrating eye injury repair                       | Narrow                 |
| Accidents and injuries (SMQ)             | Penile contusion                                    | Narrow                 |
| Accidents and injuries (SMQ)             | Penis injury                                        | Narrow                 |
| Accidents and injuries (SMQ)             | Penis reattachment                                  | Narrow                 |
| Accidents and injuries (SMQ)             | Perforation bile duct                               | Broad                  |
| Accidents and injuries (SMQ)             | Perineal injury                                     | Narrow                 |
| Accidents and injuries (SMQ)             | Peripheral nerve injury                             | Narrow                 |
| Accidents and injuries (SMQ)             | Peritoneal perforation                              | Broad                  |
| Accidents and injuries (SMQ)             | Peroneal nerve injury                               | Narrow                 |
| Accidents and injuries (SMQ)             | Pharyngeal injury                                   | Narrow                 |
| Accidents and injuries (SMQ)             | Photoelectric conjunctivitis                        | Narrow                 |
| Accidents and injuries (SMQ)             | Pneumothorax traumatic                              | Narrow                 |
| Accidents and injuries (SMQ)             | Post-concussion syndrome                            | Broad                  |
| Accidents and injuries (SMQ)             | Post-traumatic headache                             | Narrow                 |
| Accidents and injuries (SMQ)             | Post-traumatic neck syndrome                        | Narrow                 |
| Accidents and injuries (SMQ)             | Post-traumatic osteoporosis                         | Broad                  |
| Accidents and injuries (SMQ)             | Post-traumatic pain                                 | Broad                  |
| Accidents and injuries (SMQ)             | Posterior capsule rupture                           | Narrow                 |
| Accidents and injuries (SMQ)             | Posterior tibial nerve injury                       | Narrow                 |
| Accidents and injuries (SMQ)             | Prevertebral soft tissue swelling of cervical space | Broad                  |

| <b>Standardized MedDRA queries (SMQ)</b> | <b>Preferred term</b>             | <b>Term scope text</b> |
|------------------------------------------|-----------------------------------|------------------------|
| Accidents and injuries (SMQ)             | Product package associated injury | Narrow                 |
| Accidents and injuries (SMQ)             | Pubis fracture                    | Narrow                 |
| Accidents and injuries (SMQ)             | Pulmonary contusion               | Narrow                 |
| Accidents and injuries (SMQ)             | Radial head dislocation           | Narrow                 |
| Accidents and injuries (SMQ)             | Radial nerve injury               | Narrow                 |
| Accidents and injuries (SMQ)             | Radius fracture                   | Narrow                 |
| Accidents and injuries (SMQ)             | Rectal injury                     | Narrow                 |
| Accidents and injuries (SMQ)             | Renal injury                      | Broad                  |
| Accidents and injuries (SMQ)             | Repair of diaphragm injury        | Narrow                 |
| Accidents and injuries (SMQ)             | Retinal detachment                | Broad                  |
| Accidents and injuries (SMQ)             | Retinal injury                    | Narrow                 |
| Accidents and injuries (SMQ)             | Retinal tear                      | Broad                  |
| Accidents and injuries (SMQ)             | Rib fracture                      | Narrow                 |
| Accidents and injuries (SMQ)             | Road traffic accident             | Narrow                 |
| Accidents and injuries (SMQ)             | Sacroiliac fracture               | Narrow                 |
| Accidents and injuries (SMQ)             | Scapula fracture                  | Narrow                 |
| Accidents and injuries (SMQ)             | Scapulothoracic dissociation      | Narrow                 |
| Accidents and injuries (SMQ)             | Sciatic nerve injury              | Narrow                 |
| Accidents and injuries (SMQ)             | Scratch                           | Narrow                 |
| Accidents and injuries (SMQ)             | Sinus tarsi syndrome              | Narrow                 |
| Accidents and injuries (SMQ)             | Skeletal injury                   | Narrow                 |
| Accidents and injuries (SMQ)             | Skin abrasion                     | Broad                  |
| Accidents and injuries (SMQ)             | Skin injury                       | Narrow                 |
| Accidents and injuries (SMQ)             | Skull fracture                    | Narrow                 |
| Accidents and injuries (SMQ)             | Skull fractured base              | Narrow                 |
| Accidents and injuries (SMQ)             | Snake bite                        | Broad                  |
| Accidents and injuries (SMQ)             | Soft tissue injury                | Narrow                 |
| Accidents and injuries (SMQ)             | Spinal column injury              | Narrow                 |
| Accidents and injuries (SMQ)             | Spinal compression fracture       | Narrow                 |
| Accidents and injuries (SMQ)             | Spinal cord injury                | Narrow                 |
| Accidents and injuries (SMQ)             | Spinal cord injury cauda equina   | Narrow                 |
| Accidents and injuries (SMQ)             | Spinal cord injury cervical       | Narrow                 |
| Accidents and injuries (SMQ)             | Spinal cord injury lumbar         | Narrow                 |
| Accidents and injuries (SMQ)             | Spinal cord injury sacral         | Narrow                 |
| Accidents and injuries (SMQ)             | Spinal cord injury thoracic       | Narrow                 |
| Accidents and injuries (SMQ)             | Spinal epidural hematoma          | Broad                  |
| Accidents and injuries (SMQ)             | Spinal epidural hemorrhage        | Broad                  |
| Accidents and injuries (SMQ)             | Spinal fracture                   | Narrow                 |
| Accidents and injuries (SMQ)             | Spinal fusion fracture            | Narrow                 |
| Accidents and injuries (SMQ)             | Spinal shock                      | Narrow                 |
| Accidents and injuries (SMQ)             | Spinal subarachnoid hemorrhage    | Narrow                 |
| Accidents and injuries (SMQ)             | Spinal subdural hematoma          | Broad                  |
| Accidents and injuries (SMQ)             | Spleen contusion                  | Narrow                 |
| Accidents and injuries (SMQ)             | Splenic injury                    | Narrow                 |
| Accidents and injuries (SMQ)             | Splenic rupture                   | Narrow                 |
| Accidents and injuries (SMQ)             | Splenosis                         | Broad                  |
| Accidents and injuries (SMQ)             | Splinter                          | Narrow                 |
| Accidents and injuries (SMQ)             | Spondylopathy traumatic           | Narrow                 |
| Accidents and injuries (SMQ)             | Sports injury                     | Narrow                 |
| Accidents and injuries (SMQ)             | Stab wound                        | Narrow                 |
| Accidents and injuries (SMQ)             | Sternal fracture                  | Narrow                 |
| Accidents and injuries (SMQ)             | Sternal injury                    | Narrow                 |

| Standardized MedDRA queries (SMQ) | Preferred term                                           | Term scope text |
|-----------------------------------|----------------------------------------------------------|-----------------|
| Accidents and injuries (SMQ)      | Stress fracture                                          | Narrow          |
| Accidents and injuries (SMQ)      | Struck by lightning                                      | Narrow          |
| Accidents and injuries (SMQ)      | Subdural hematoma                                        | Broad           |
| Accidents and injuries (SMQ)      | Subdural hematoma evacuation                             | Broad           |
| Accidents and injuries (SMQ)      | Subdural hemorrhage                                      | Broad           |
| Accidents and injuries (SMQ)      | Subretinal fluid                                         | Broad           |
| Accidents and injuries (SMQ)      | Sunburn                                                  | Narrow          |
| Accidents and injuries (SMQ)      | Superficial injury of eye                                | Narrow          |
| Accidents and injuries (SMQ)      | Sympathetic nerve injury                                 | Narrow          |
| Accidents and injuries (SMQ)      | Synovial rupture                                         | Broad           |
| Accidents and injuries (SMQ)      | Tendon injury                                            | Narrow          |
| Accidents and injuries (SMQ)      | Tendon rupture                                           | Narrow          |
| Accidents and injuries (SMQ)      | Testicular injury                                        | Narrow          |
| Accidents and injuries (SMQ)      | Thermal burn                                             | Narrow          |
| Accidents and injuries (SMQ)      | Thermal burns of eye                                     | Narrow          |
| Accidents and injuries (SMQ)      | Thoracic vertebral fracture                              | Narrow          |
| Accidents and injuries (SMQ)      | Tibia fracture                                           | Narrow          |
| Accidents and injuries (SMQ)      | Tongue injury                                            | Narrow          |
| Accidents and injuries (SMQ)      | Tooth avulsion                                           | Narrow          |
| Accidents and injuries (SMQ)      | Tooth fracture                                           | Narrow          |
| Accidents and injuries (SMQ)      | Tooth injury                                             | Narrow          |
| Accidents and injuries (SMQ)      | Torus fracture                                           | Narrow          |
| Accidents and injuries (SMQ)      | Tracheal injury                                          | Narrow          |
| Accidents and injuries (SMQ)      | Traumatic amputation                                     | Narrow          |
| Accidents and injuries (SMQ)      | Traumatic anuria                                         | Narrow          |
| Accidents and injuries (SMQ)      | Traumatic arthritis                                      | Narrow          |
| Accidents and injuries (SMQ)      | Traumatic arthropathy                                    | Narrow          |
| Accidents and injuries (SMQ)      | Traumatic arthrosis                                      | Narrow          |
| Accidents and injuries (SMQ)      | Traumatic coma                                           | Narrow          |
| Accidents and injuries (SMQ)      | Traumatic ear amputation                                 | Narrow          |
| Accidents and injuries (SMQ)      | Traumatic fracture                                       | Narrow          |
| Accidents and injuries (SMQ)      | Traumatic hematoma                                       | Narrow          |
| Accidents and injuries (SMQ)      | Traumatic hemorrhage                                     | Narrow          |
| Accidents and injuries (SMQ)      | Traumatic hemothorax                                     | Narrow          |
| Accidents and injuries (SMQ)      | Traumatic intracranial hemorrhage                        | Narrow          |
| Accidents and injuries (SMQ)      | Traumatic iritis                                         | Narrow          |
| Accidents and injuries (SMQ)      | Traumatic liver injury                                   | Narrow          |
| Accidents and injuries (SMQ)      | Traumatic lung injury                                    | Narrow          |
| Accidents and injuries (SMQ)      | Traumatic pancreatitis                                   | Narrow          |
| Accidents and injuries (SMQ)      | Traumatic renal injury                                   | Narrow          |
| Accidents and injuries (SMQ)      | Traumatic shock                                          | Narrow          |
| Accidents and injuries (SMQ)      | Traumatic spinal cord compression                        | Narrow          |
| Accidents and injuries (SMQ)      | Traumatic torticollis                                    | Narrow          |
| Accidents and injuries (SMQ)      | Traumatic ulcer                                          | Narrow          |
| Accidents and injuries (SMQ)      | Traumatic ulcerative granuloma with stromal eosinophilia | Broad           |
| Accidents and injuries (SMQ)      | Trench foot                                              | Broad           |
| Accidents and injuries (SMQ)      | Tympanic membrane perforation                            | Broad           |
| Accidents and injuries (SMQ)      | Ulna fracture                                            | Narrow          |
| Accidents and injuries (SMQ)      | Ulnar nerve injury                                       | Narrow          |
| Accidents and injuries (SMQ)      | Upper limb fracture                                      | Narrow          |

| Standardized MedDRA queries (SMQ) | Preferred term                                                  | Term scope text |
|-----------------------------------|-----------------------------------------------------------------|-----------------|
| Accidents and injuries (SMQ)      | Ureteric injury                                                 | Narrow          |
| Accidents and injuries (SMQ)      | Ureteric perforation                                            | Broad           |
| Accidents and injuries (SMQ)      | Ureteric rupture                                                | Narrow          |
| Accidents and injuries (SMQ)      | Urethral injury                                                 | Narrow          |
| Accidents and injuries (SMQ)      | Urethral perforation                                            | Broad           |
| Accidents and injuries (SMQ)      | Urethral stricture traumatic                                    | Narrow          |
| Accidents and injuries (SMQ)      | Urinary bladder rupture                                         | Narrow          |
| Accidents and injuries (SMQ)      | Urinary tract injury                                            | Narrow          |
| Accidents and injuries (SMQ)      | Uterine perforation                                             | Broad           |
| Accidents and injuries (SMQ)      | Uveal prolapse                                                  | Broad           |
| Accidents and injuries (SMQ)      | VIIIth nerve injury                                             | Narrow          |
| Accidents and injuries (SMQ)      | VIIth nerve injury                                              | Narrow          |
| Accidents and injuries (SMQ)      | VIth nerve injury                                               | Narrow          |
| Accidents and injuries (SMQ)      | Vaginal laceration                                              | Narrow          |
| Accidents and injuries (SMQ)      | Vaginal perforation                                             | Broad           |
| Accidents and injuries (SMQ)      | Vascular injury                                                 | Narrow          |
| Accidents and injuries (SMQ)      | Vascular rupture                                                | Narrow          |
| Accidents and injuries (SMQ)      | Vena cava injury                                                | Narrow          |
| Accidents and injuries (SMQ)      | Venous injury                                                   | Narrow          |
| Accidents and injuries (SMQ)      | Ventricle rupture                                               | Narrow          |
| Accidents and injuries (SMQ)      | Vitreous detachment                                             | Broad           |
| Accidents and injuries (SMQ)      | Vitreous injury                                                 | Narrow          |
| Accidents and injuries (SMQ)      | Vitreous loss                                                   | Broad           |
| Accidents and injuries (SMQ)      | Vitreous prolapse                                               | Broad           |
| Accidents and injuries (SMQ)      | Vth nerve injury                                                | Narrow          |
| Accidents and injuries (SMQ)      | Vulval laceration                                               | Narrow          |
| Accidents and injuries (SMQ)      | Vulvovaginal injury                                             | Narrow          |
| Accidents and injuries (SMQ)      | Wound                                                           | Broad           |
| Accidents and injuries (SMQ)      | Wrist fracture                                                  | Narrow          |
| Accidents and injuries (SMQ)      | XIIth nerve injury                                              | Narrow          |
| Accidents and injuries (SMQ)      | XIth nerve injury                                               | Narrow          |
| Convulsions (SMQ)                 | Acquired epileptic aphasia                                      | Narrow          |
|                                   | Acute encephalitis with refractory, repetitive partial seizures | Narrow          |
| Convulsions (SMQ)                 | Alcoholic seizure                                               | Narrow          |
| Convulsions (SMQ)                 | Amygdalohippocampectomy                                         | Broad           |
| Convulsions (SMQ)                 | Atonic seizures                                                 | Narrow          |
| Convulsions (SMQ)                 | Atypical benign partial epilepsy                                | Narrow          |
| Convulsions (SMQ)                 | Aura                                                            | Broad           |
| Convulsions (SMQ)                 | Automatism epileptic                                            | Narrow          |
| Convulsions (SMQ)                 | Autonomic seizure                                               | Narrow          |
| Convulsions (SMQ)                 | Baltic myoclonic epilepsy                                       | Narrow          |
|                                   | Benign familial neonatal convulsions                            | Narrow          |
| Convulsions (SMQ)                 | Benign rolandic epilepsy                                        | Narrow          |
| Convulsions (SMQ)                 | Biotinidase deficiency                                          | Narrow          |
| Convulsions (SMQ)                 | Change in seizure presentation                                  | Narrow          |
| Convulsions (SMQ)                 | Clonic convulsion                                               | Narrow          |
| Convulsions (SMQ)                 | Complex partial seizures                                        | Narrow          |
| Convulsions (SMQ)                 | Convulsion in childhood                                         | Narrow          |
| Convulsions (SMQ)                 | Convulsion neonatal                                             | Narrow          |
| Convulsions (SMQ)                 | Convulsion prophylaxis                                          | Broad           |
| Convulsions (SMQ)                 | Convulsions local                                               | Narrow          |

| <b>Standardized MedDRA queries (SMQ)</b> | <b>Preferred term</b>                                           | <b>Term scope text</b> |
|------------------------------------------|-----------------------------------------------------------------|------------------------|
| Convulsions (SMQ)                        | Convulsive threshold lowered                                    | Narrow                 |
| Convulsions (SMQ)                        | Corpus callosotomy                                              | Broad                  |
| Convulsions (SMQ)                        | Deja vu                                                         | Narrow                 |
| Convulsions (SMQ)                        | Double cortex syndrome                                          | Narrow                 |
| Convulsions (SMQ)                        | Dreamy state                                                    | Narrow                 |
| Convulsions (SMQ)                        | Drop attacks                                                    | Broad                  |
| Convulsions (SMQ)                        | Drug withdrawal convulsions                                     | Narrow                 |
|                                          | Early infantile epileptic encephalopathy with burst-suppression | Narrow                 |
| Convulsions (SMQ)                        | Eclampsia                                                       | Narrow                 |
| Convulsions (SMQ)                        | Epilepsy                                                        | Narrow                 |
| Convulsions (SMQ)                        | Epileptic aura                                                  | Narrow                 |
| Convulsions (SMQ)                        | Epileptic psychosis                                             | Narrow                 |
| Convulsions (SMQ)                        | Febrile convulsion                                              | Narrow                 |
| Convulsions (SMQ)                        | Foaming at mouth                                                | Broad                  |
| Convulsions (SMQ)                        | Frontal lobe epilepsy                                           | Narrow                 |
|                                          | Generalized non-convulsive epilepsy                             | Narrow                 |
| Convulsions (SMQ)                        | Generalized tonic-clonic seizure                                | Narrow                 |
| Convulsions (SMQ)                        | Hyperglycemic seizure                                           | Narrow                 |
| Convulsions (SMQ)                        | Hypocalcemic seizure                                            | Narrow                 |
| Convulsions (SMQ)                        | Hypoglycemic seizure                                            | Narrow                 |
| Convulsions (SMQ)                        | Hyponatremic seizure                                            | Narrow                 |
| Convulsions (SMQ)                        | Idiopathic generalized epilepsy                                 | Narrow                 |
| Convulsions (SMQ)                        | Infantile spasms                                                | Narrow                 |
| Convulsions (SMQ)                        | Juvenile myoclonic epilepsy                                     | Narrow                 |
| Convulsions (SMQ)                        | Lafora's myoclonic epilepsy                                     | Narrow                 |
| Convulsions (SMQ)                        | Lennox-Gastaut syndrome                                         | Narrow                 |
| Convulsions (SMQ)                        | Migraine-triggered seizure                                      | Narrow                 |
|                                          | Molybdenum cofactor deficiency                                  | Narrow                 |
| Convulsions (SMQ)                        | Myoclonic epilepsy                                              | Narrow                 |
|                                          | Myoclonic epilepsy and ragged-red fibers                        | Narrow                 |
| Convulsions (SMQ)                        | Narcolepsy                                                      | Broad                  |
| Convulsions (SMQ)                        | Partial seizures                                                | Narrow                 |
|                                          | Partial seizures with secondary generalization                  | Narrow                 |
| Convulsions (SMQ)                        | Petit mal epilepsy                                              | Narrow                 |
| Convulsions (SMQ)                        | Polymicrogyria                                                  | Narrow                 |
| Convulsions (SMQ)                        | Post stroke epilepsy                                            | Narrow                 |
| Convulsions (SMQ)                        | Post stroke seizure                                             | Narrow                 |
| Convulsions (SMQ)                        | Post-traumatic epilepsy                                         | Narrow                 |
| Convulsions (SMQ)                        | Postictal headache                                              | Narrow                 |
| Convulsions (SMQ)                        | Postictal paralysis                                             | Narrow                 |
| Convulsions (SMQ)                        | Postictal psychosis                                             | Narrow                 |
| Convulsions (SMQ)                        | Postictal state                                                 | Narrow                 |
| Convulsions (SMQ)                        | Preictal state                                                  | Broad                  |
| Convulsions (SMQ)                        | Psychomotor seizures                                            | Narrow                 |
| Convulsions (SMQ)                        | Schizencephaly                                                  | Narrow                 |
| Convulsions (SMQ)                        | Seizure                                                         | Narrow                 |
| Convulsions (SMQ)                        | Seizure anoxic                                                  | Narrow                 |

| <b>Standardized MedDRA queries (SMQ)</b> | <b>Preferred term</b>                | <b>Term scope text</b> |
|------------------------------------------|--------------------------------------|------------------------|
| Convulsions (SMQ)                        | Seizure cluster                      | Narrow                 |
| Convulsions (SMQ)                        | Seizure like phenomena               | Narrow                 |
| Convulsions (SMQ)                        | Severe myoclonic epilepsy of infancy | Narrow                 |
| Convulsions (SMQ)                        | Simple partial seizures              | Narrow                 |
| Convulsions (SMQ)                        | Status epilepticus                   | Narrow                 |
| Convulsions (SMQ)                        | Sudden unexplained death in epilepsy | Narrow                 |
| Convulsions (SMQ)                        | Temporal lobe epilepsy               | Narrow                 |
| Convulsions (SMQ)                        | Tongue biting                        | Broad                  |
| Convulsions (SMQ)                        | Tonic clonic movements               | Narrow                 |
| Convulsions (SMQ)                        | Tonic convulsion                     | Narrow                 |
| Convulsions (SMQ)                        | Tonic posturing                      | Narrow                 |
| Convulsions (SMQ)                        | Topectomy                            | Narrow                 |
| Convulsions (SMQ)                        | Uncinate fits                        | Narrow                 |
| nmq_hypo                                 | Blood glucose decreased              | Narrow                 |
| nmq_hypo                                 | Hyperinsulinaemic hypoglycemia       | Narrow                 |
| nmq_hypo                                 | Hypoglycemia                         | Narrow                 |
| nmq_hypo                                 | Hypoglycemia neonatal                | Narrow                 |
| nmq_hypo                                 | Hypoglycemia unawareness             | Narrow                 |
| nmq_hypo                                 | Hypoglycemic coma                    | Narrow                 |
| nmq_hypo                                 | Hypoglycemic encephalopathy          | Narrow                 |
| nmq_hypo                                 | Hypoglycemic seizure                 | Narrow                 |
| nmq_hypo                                 | Hypoglycemic unconsciousness         | Narrow                 |
| nmq_hypo                                 | Neuroglycopenia                      | Narrow                 |
| nmq_hypo                                 | Shock hypoglycemic                   | Narrow                 |

**eTable 3. Multiple imputation tipping analysis for primary endpoint**

|                                              | <b>Insulin degludec</b> | <b>Insulin glargine U100</b> | <b>ERR [95%CI]</b> |
|----------------------------------------------|-------------------------|------------------------------|--------------------|
| Rate per 100 PYE – MI analysis               | 99.1                    | 142.1                        | 0.70 [0.61; 0.80]  |
| Rate per 100 PYE – MI tipping point analysis | 4 episode penalty       |                              | 0.92 [0.81; 1.04]  |
| <b>Completers</b>                            |                         |                              |                    |
| N                                            | 607                     | 599                          |                    |
| PYE                                          | 186.6                   | 184.3                        |                    |
| Total no. of episodes                        | 344                     | 492                          |                    |
| Mean no. of episodes                         | 0.6                     | 0.8                          |                    |
| Rate per 100 PYE                             | 184.4                   | 267.0                        |                    |
| <b>Non-completers multiple imputation</b>    |                         |                              |                    |
| N                                            | 64                      | 66                           |                    |
| PYE                                          | 19.7                    | 20.3                         |                    |
| Total no. of episodes                        | 67                      | 70                           |                    |
| Mean no. of episodes                         | 1                       | 1.1                          |                    |
| Rate per 100 PYE                             | 340.0                   | 343.5                        |                    |
| <b>Non-completers tipping point</b>          |                         |                              |                    |
| N                                            | 64                      | 66                           |                    |
| PYE                                          | 19.7                    | 20.3                         |                    |
| Total no. of episodes                        | 323.0                   | 70                           |                    |
| Mean no. of episodes                         | 5                       | 1.1                          |                    |
| Rate per 100 PYE                             | 1640.0                  | 343.5                        |                    |

CI, confidence interval; ERR, estimated rate ratio; MI, multiple imputation; N, number of patients; PYE, patient-years of exposure

For the tipping-point analysis, 4 episodes are added to the values obtained from multiple imputation for all patients on insulin degludec.

**eTable 4. Insulin dose**

| <b>Insulin dose (Units)</b> |                 |                                  |                                  |
|-----------------------------|-----------------|----------------------------------|----------------------------------|
| <b>Treatment arm</b>        | <b>Baseline</b> | <b>End of treatment period 1</b> | <b>End of treatment period 2</b> |
| IDeg/IGlar                  | 40 (22)         | 70 (41)                          | 83 (50)                          |
| IGlar/IDeg                  | 43 (26)         | 74 (41)                          | 83 (54)                          |

Data are arithmetic mean (standard deviation) for the safety analysis set. IDeg, insulin degludec; IGlar, insulin glargine U100. Only patients with exposure time in both maintenance periods contribute to the analysis.



**eTable 5. Adverse events**

|                                               | IDeg<br>(n = 671)<br>PYE = 388.8 |      |      |                              | IGlar<br>(n = 665)<br>PYE = 383.5 |      |      |                              |
|-----------------------------------------------|----------------------------------|------|------|------------------------------|-----------------------------------|------|------|------------------------------|
|                                               | n                                | %    | E    | Rate/<br>100 PYE<br>[95% CI] | n                                 | %    | E    | Rate/<br>100 PYE<br>[95% CI] |
| AEs                                           | 384                              | 57.2 | 1293 | 332.6<br>[314.5; 350.7]      | 406                               | 61.1 | 1381 | 360.1<br>[341.1; 379.1]      |
| Serious AEs                                   | 64                               | 9.5  | 80   | 20.6<br>[16.1; 25.1]         | 65                                | 9.8  | 96   | 25.0<br>[20.0; 30.0]         |
| Severe AEs                                    | 58                               | 8.6  | 89   | 22.9<br>[18.1; 27.7]         | 52                                | 7.8  | 90   | 23.5<br>[18.6; 28.3]         |
| AEs probably related to trial product         | 9                                | 1.3  | 14   | 3.6<br>[1.7; 5.5]            | 18                                | 2.7  | 20   | 5.2<br>[2.9; 7.5]            |
| Serious AEs probably related to trial product | 2                                | 0.3  | 2    | 0.5<br>[-0.2; 1.2]           | 7                                 | 1.1  | 7    | 1.8<br>[0.5; 3.2]            |

Data are for safety analysis set. AE, adverse event; CI, confidence interval; E, number of events; IDeg, insulin degludec; IGlar, insulin glargine U100; n, number of patients with events; PYE, patient-years of exposure; Rate, unadjusted event rate (events/100 patient-years of exposure); %, proportion of patients with events.
